# Supplementary material for: Thiazole Derivatives as Modulators of GluA2 AMPA Receptors: Potent Allosteric Effects and Neuroprotective Potential
Source: MDPI journal article supplement (doi:10.3390/biom13121694), 2023-11-23

## **Supplementary Material**

### **Thiazole Derivatives as Modulators of GluA2 AMPA Receptors: Potent Allosteric Effects and Neuroprotective Potential**

**Mohammed Hawash**

Department of Pharmacy, Faculty of Medicine and Health Sciences, An-Najah National University, Nablus, Palestine.

**\*Corresponding author: Mohammed Hawash**, Department of Pharmacy, Faculty of Medicine and Health Sciences, An-Najah National University, Nablus, PALESTINE, [orcid.org/0000-0001-5640-9700](https://orcid.org/0000-0001-5640-9700); Phone: +972569939939; Email: [mohawash@najah.edu](mailto:mohawash@najah.edu).

| <b>Figures and Tables</b>                                                  | <b>Pages</b> |
|----------------------------------------------------------------------------|--------------|
| <b>Supplemental Table S1 Whole-cell recordings for compound MMH-1.....</b> | <b>3</b>     |
| <b>Supplemental Table S2 Whole-Cell Recordings for Compound MMH-2.....</b> | <b>3</b>     |
| <b>Supplemental Table S3 Whole-Cell Recordings for Compound MMH-3.....</b> | <b>3</b>     |
| <b>Supplemental Table S4 Whole-Cell Recordings for Compound MMH-4.....</b> | <b>4</b>     |
| <b>Supplemental Table S5 Whole-Cell Recordings for Compound MMH-5.....</b> | <b>4</b>     |
| <b>Figure S1. NMR Spectrum of MMH1 .....</b>                               | <b>5</b>     |
| <b>Figure S2. NMR Spectrum of MMH2.....</b>                                | <b>6</b>     |
| <b>Figure S3. NMR Spectrum of MMH3.....</b>                                | <b>7</b>     |
| <b>Figure S4. NMR Spectrum of MMH4.....</b>                                | <b>8</b>     |
| <b>Figure S5. NMR Spectrum of MMH5.....</b>                                | <b>9</b>     |

**Supplemental Table S1 Whole-Cell Recordings for Compound MMH-1**

| Receptor Name/Compounds abbreviation | GluA2 (Glutamate Alone) | MMH-1                | Applying Glutamate Alone After MMH-1 | n | A/A <sub>i</sub> |
|--------------------------------------|-------------------------|----------------------|--------------------------------------|---|------------------|
| Amplitude (pA)                       | 1151±59                 | 325±26 <sup>**</sup> | 1154±60                              | 6 | 3.54±0.2         |
| t deact (ms)                         | N/R                     | 2.9±0.2 <sup>*</sup> | N/R                                  | 6 | N/R              |
| t des (ms)                           | N/R                     | 2.1±0.1 <sup>*</sup> | N/R                                  | 6 | N/R              |

**Supplemental Table S2 Whole-Cell Recordings for Compound MMH-2**

| Receptor Name/Compound s abbreviation | GluA2 (Glutamate Alone) | MMH-2                 | Applying Glutamate Alone After MMH-2 | n | A/A <sub>i</sub> |
|---------------------------------------|-------------------------|-----------------------|--------------------------------------|---|------------------|
| Amplitude (pA)                        | 1135±53                 | 408±32 <sup>*</sup>   | 1139±56                              | 6 | 2.78±0.1         |
| t deact (ms)                          | N/R                     | 2.2±0.1 <sup>ns</sup> | N/R                                  | 6 | N/R              |
| t des (ms)                            | N/R                     | 2.6±0.1 <sup>ns</sup> | N/R                                  | 6 | N/R              |

**Supplemental Table S3 Whole-Cell Recordings for Compound MMH-3**

| Receptor Name/Compounds abbreviation | GluA2 (Glutamate Alone) | MMH-3                 | Applying Glutamate Alone After MMH-3 | n | A/A <sub>i</sub> |
|--------------------------------------|-------------------------|-----------------------|--------------------------------------|---|------------------|
| Amplitude (pA)                       | 1161±62                 | 289±29 <sup>**</sup>  | 1163±64                              | 6 | 4.02±0.2         |
| t deact (ms)                         | N/R                     | 3.6±0.3 <sup>**</sup> | N/R                                  | 6 | N/R              |
| t des (ms)                           | N/R                     | 1.9±0.1 <sup>**</sup> | N/R                                  | 6 | N/R              |

**Supplemental Table S4 Whole-Cell Recordings for Compound MMH-4**

| Receptor Name/Compounds abbreviation | GluA2 (Glutamate Alone) | MMH-4     | Applying Glutamate Alone After MMH-4 | n | A/A <sub>i</sub> |
|--------------------------------------|-------------------------|-----------|--------------------------------------|---|------------------|
| Amplitude (pA)                       | 1182±76                 | 246±27**  | 1178±75                              | 6 | 4.81±0.2         |
| t deact (ms)                         | N/R                     | 4.1±0.4** | N/R                                  | 6 | N/R              |
| t des (ms)                           | N/R                     | 1.7±0.1** | N/R                                  | 6 | N/R              |

**Supplemental Table S5 Whole-Cell Recordings for Compound MMH-5**

| Receptor Name/Compounds abbreviation | GluA2 (Glutamate Alone) | MMH-5      | Applying Glutamate Alone After MMH-5 | n | A/A <sub>i</sub> |
|--------------------------------------|-------------------------|------------|--------------------------------------|---|------------------|
| Amplitude (pA)                       | 1175±71                 | 190±20***  | 1174±66                              | 6 | 6.18±0.3         |
| t deact (ms)                         | 2.3±0.1                 | 5.4±0.5*** | N/R                                  | 6 | N/R              |
| t des (ms)                           | 2.7±0.1                 | 1.2±0.1*** | N/R                                  | 6 | N/R              |

**FigureS1.** 2-(3,4-dimethoxyphenyl)-4-methyl-N-(3,4,5-trimethoxyphenyl)thiazole-5-carboxamide (MMH1)

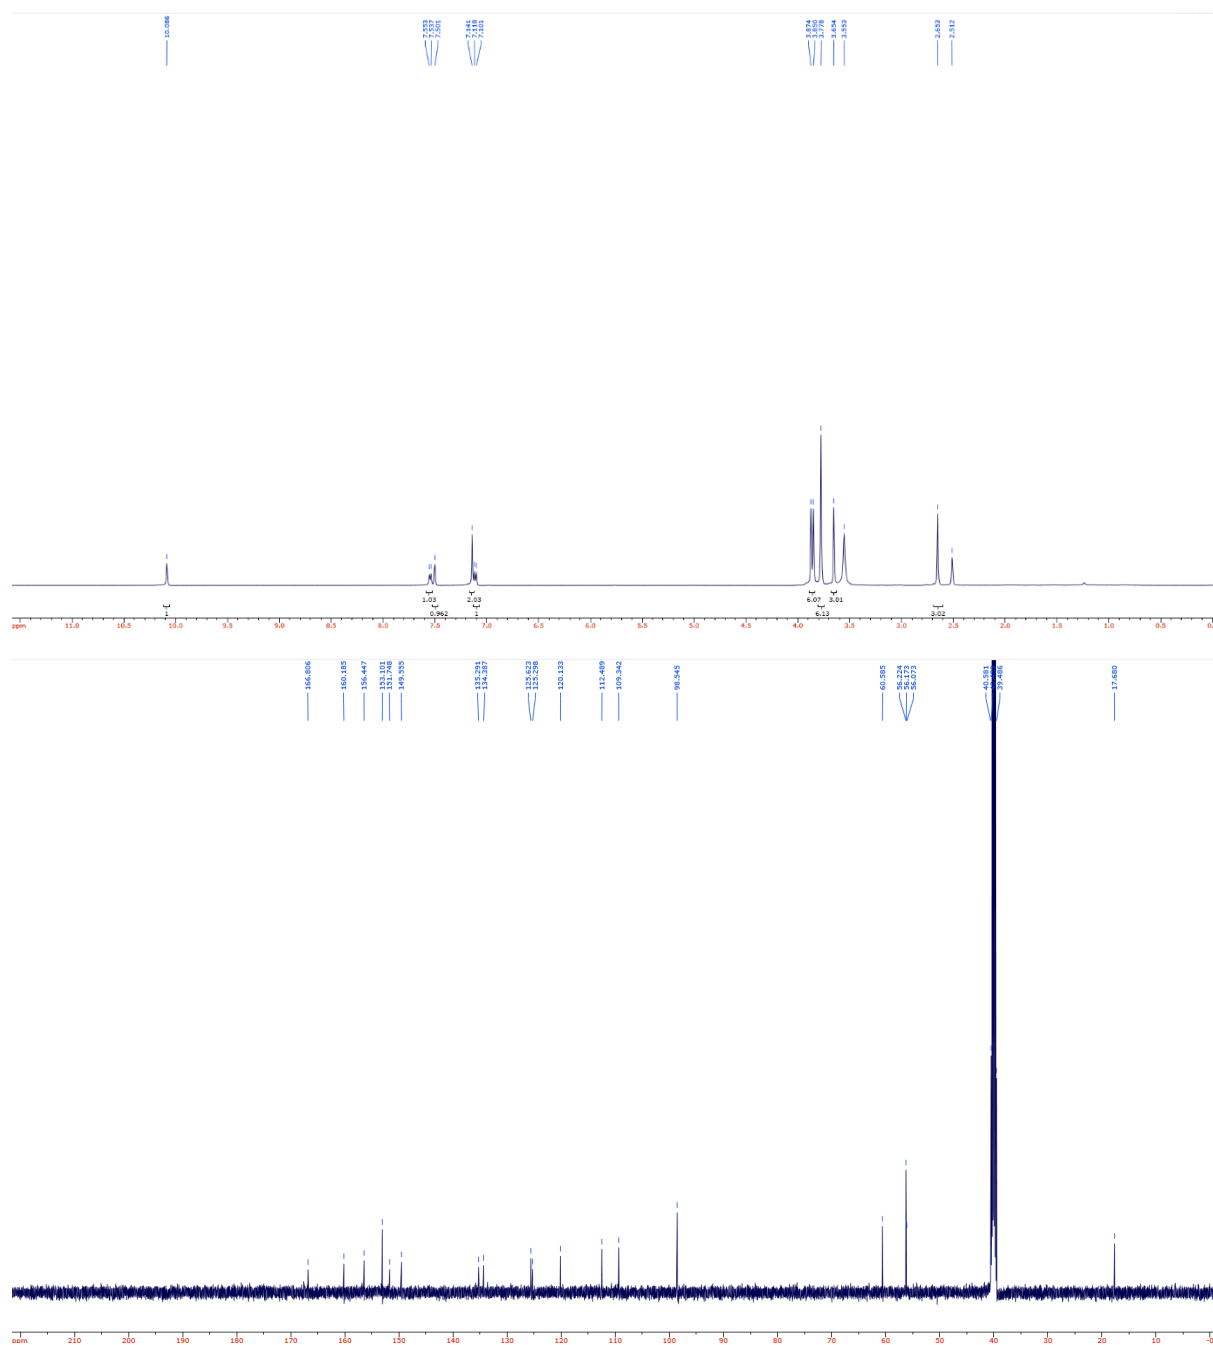



**Figure S3. N,2-bis(3,4-dimethoxyphenyl)-4-methylthiazole-5-carboxamide (MMH3)**

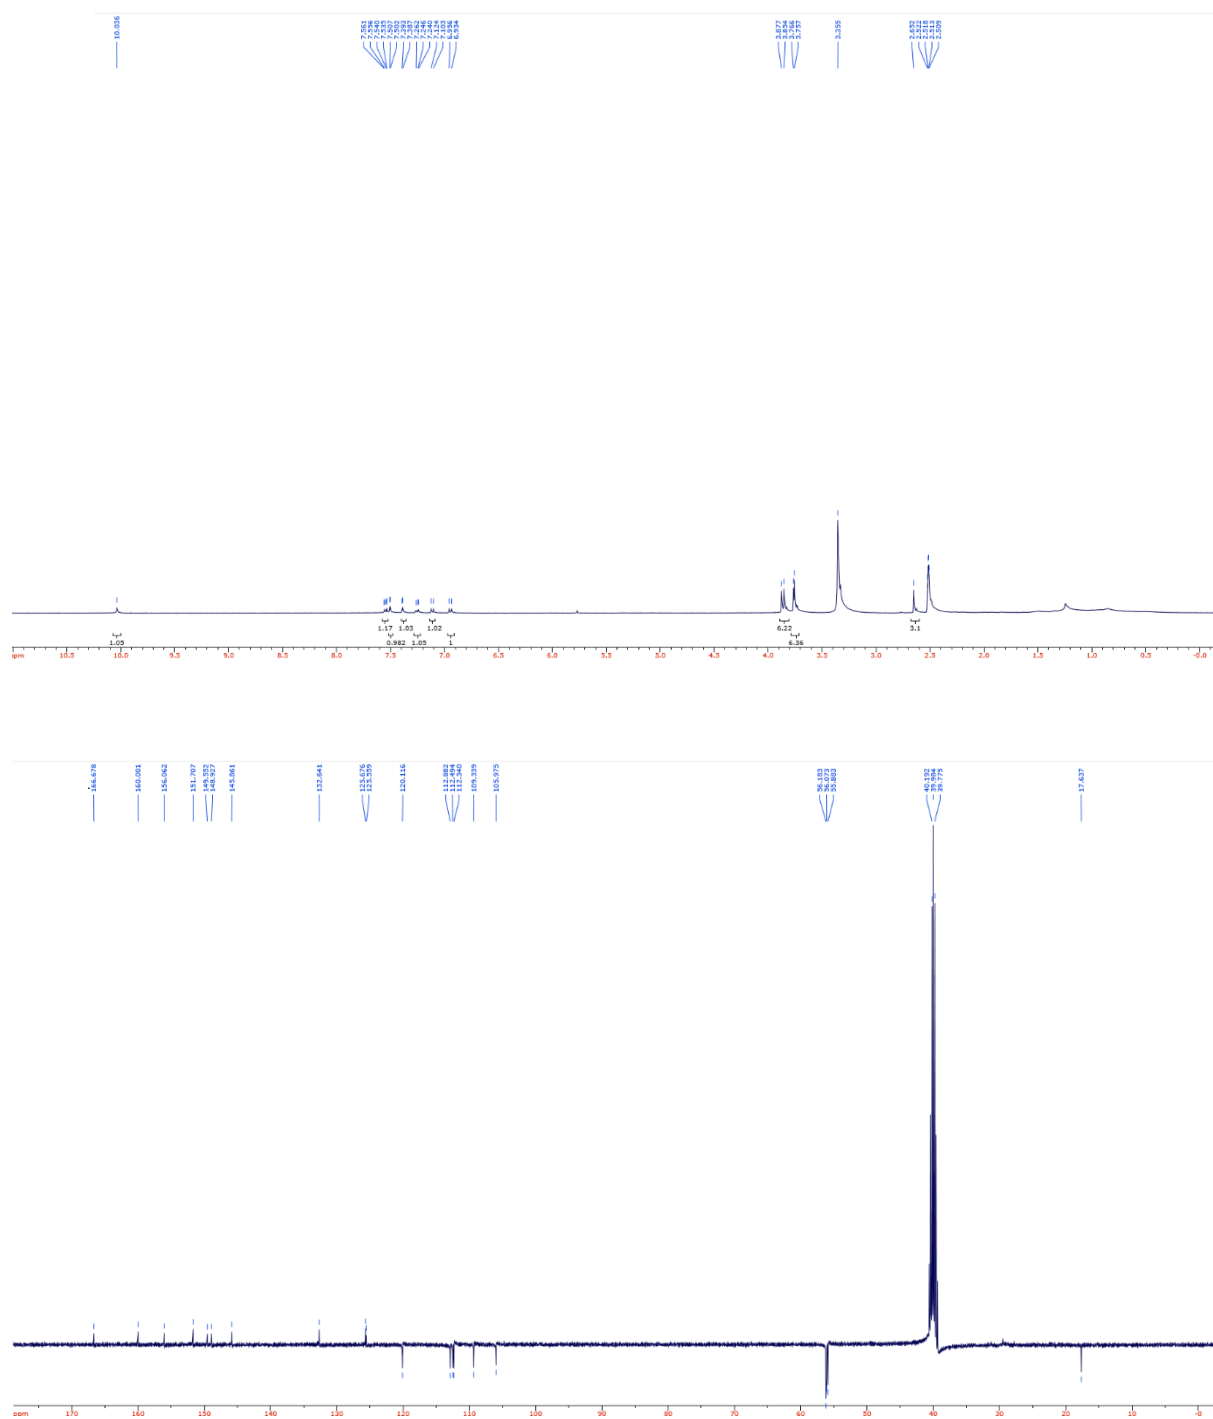

**Figure S4.** 2-(3,4-dimethoxyphenyl)-N-(3,5-dimethoxyphenyl)-4-methylthiazole-5-carboxamide (MMH4)

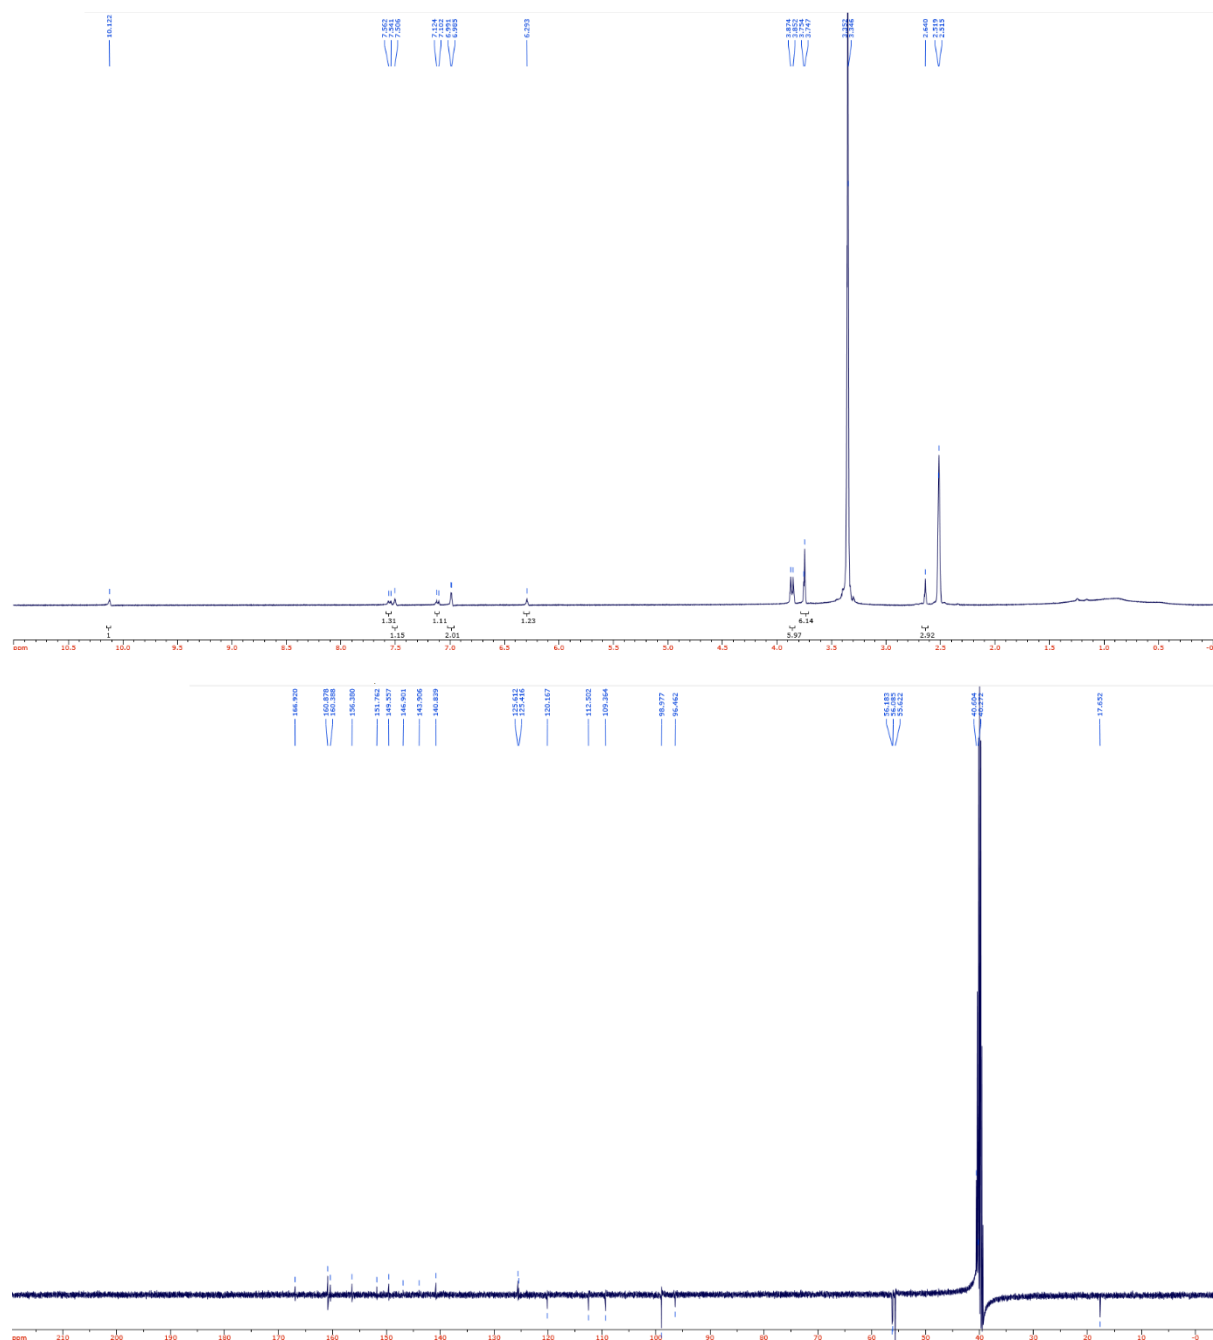



**Figure S5.** 2-(3,4-dimethoxyphenyl)-4-methyl-N-(4-(methylthio)phenyl)thiazole-5-carboxamide (MMH5)

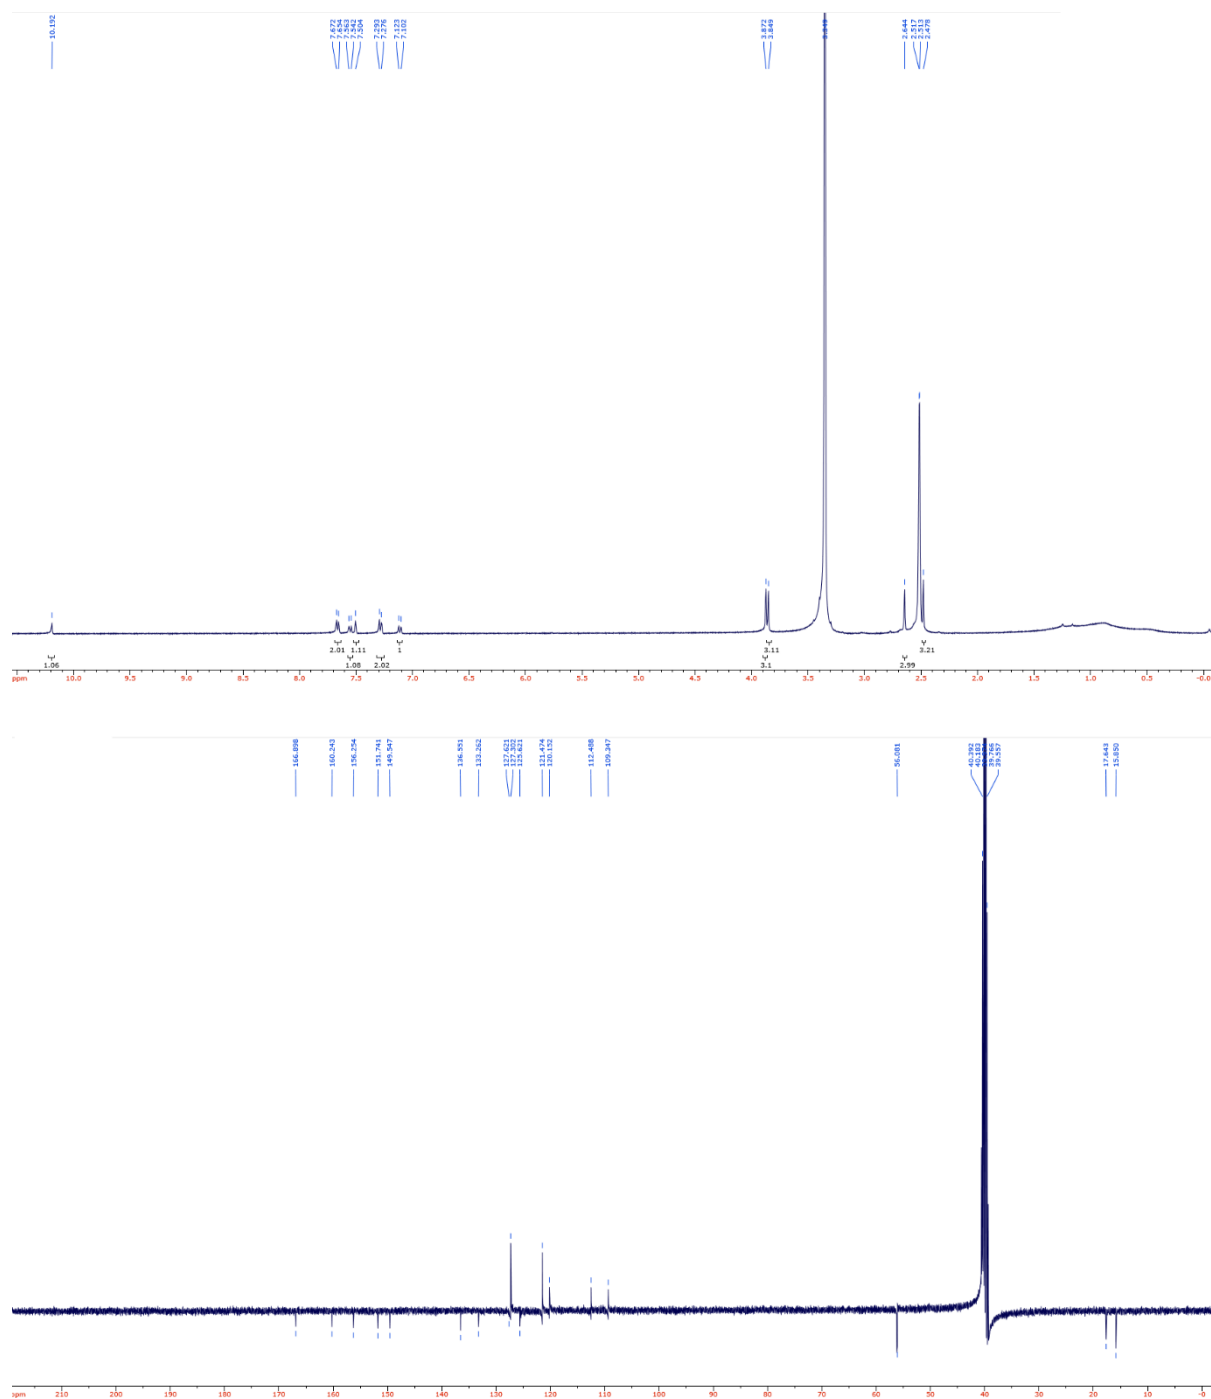

Supplement: s1 [file s1]
